# Supplementary material
Source: Research Square preprint supplement (doi:10.21203/rs.3.rs-8851480/v1)
Supplement: Supplementary file 1 [file a94213e53fb5ff25bbd29a26.docx]

The Semi-structured Interview Outline

1.Please recall a patient safety incident you personally experienced. Describe your handling process and inner feelings at the time.

2 Following the incident, whom or which channels did you approach for assistance? Why did you consider these the most appropriate options?

3 What concerns might you have had when seeking support? Could you illustrate these with specific examples?

4 Have you ever expressed stress during departmental meetings or similar settings, and how did such expression affect your working relationships? 5 If asked to design a support system for nursing managers, what features would genuinely address your pain points?
